# Supplementary material for: Bias in Youth with Functional Abdominal Pain (BY-FAP) – A new experimental design to examine cognitive biases for gastrointestinal related stimuli in children and adolescents
Source: Preprints.org preprint supplement (doi:10.20944/preprints202306.0017.v1), 2023-06-01
Supplement: Supplementary file 1 [file supplementary]

## Supplementary Material

**Table S1. Symptom words used in encoding and recognition phases**

| Encoding phase                                                    | Foils for recognition                                                                                |
|-------------------------------------------------------------------|------------------------------------------------------------------------------------------------------|
| <b>General symptoms</b>                                           |                                                                                                      |
| Hovedpine<br>(CSSI: Headaches)                                    | Trykken for brystet<br>(HNST: Chest pain)                                                            |
| Svimmelhed<br>(CSSI: Faintness or dizziness)                      | Smerter i knæ, albuer og andre led<br>(CSSI: Pain in your knees, elbows or other joints)             |
| Træthed<br>(Tiredness (CSI: Low energy/slowed down))              | Feber<br>(HNST: Fever)                                                                               |
| Ømme muskler<br>(CSSI: Sore muscles)                              | Følelsesløshed eller prikken i dele af kroppen<br>(CSSI: Numbness or tingling in parts of your body) |
| Hoste<br>(HNST: Coughing)                                         | Sløret syn<br>(CSSI: Blurred vision)                                                                 |
| Svært ved at trække vejret<br>(CSSI: Trouble getting your breath) | Svaghed<br>(CSSI: Weakness in parts of your body)                                                    |
| Svedeture eller kulderystelser<br>(CSSI: Hot or cold spells)      | Udmattet<br>(Exhausted)                                                                              |
| Smerter i ryggen<br>(CSSI: Pains in your lower back)              | Nyse<br>(HNST: Sneezing)                                                                             |
| Smerter i arme og ben<br>(CSSI: Pain in your arms or legs)        | Ondt i ørerne<br>(HNST: Earache)                                                                     |
| Hjertebanken<br>(CSSI: Your heart beating too fast)               | Smerte i hjerte eller bryst<br>(CSSI: Pain in your heart or chest)                                   |

| Encoding phase                                                  | Foils for recognition                              |
|-----------------------------------------------------------------|----------------------------------------------------|
| <b>Gastrointestinal symptoms</b>                                |                                                    |
| Mavesmerter<br>(PedsQL (GSS): Pain in abdomen/stomach)          | Trykken i maven<br>(Stomach pressure)              |
| Diarre<br>(PedsQLGSS: Diarrhea)                                 | Ikke kunne tåle mad<br>(CSSI: Food makes you sick) |
| Forstoppelse<br>(PedsQL (GSS): Constipation)                    | Klump i halsen<br>(Lump in the throat)             |
| Kvalme<br>(PedsQL (GSS): Nausea)                                | Bøvsen<br>(Burping)                                |
| Opkast<br>(PedsQL (GSS): Vomiting)                              | Hård mave<br>(Difficulty passing stools)           |
| Ubehag i maven<br>(PedsQL (GSS): Discomfort in stomach/abdomen) | Mavekramper<br>(Stomach cramps)                    |
| Besvær med at synke<br>(CSSI: Difficulty swallowing)            | Sure opstød<br>(Heart burn/pyrosis)                |
| Oppustethed<br>(PedsQL (GSS): Bloating)                         | Rumlen i maven<br>(Stomach rumbling)               |
| Dårlig appetit<br>(PedsQL (GSS): Not feeling hungry)            | Prutte<br>(Farting/flatulence)                     |
| Luft i maven<br>(Trapped gas)                                   | Tynd mave<br>(Loose and watery stools)             |

*Table S1: Overview of Danish symptom words used in encoding and recognition phase with corresponding English words in parenthesis. CSSI: Children's Somatic Symptoms Inventory. HNST: Health Norms Sorting Task. PedsQL (GSS): Pediatric Quality of Life, Gastrointestinal Symptoms Scale.*

**Table S2. Description of pictures from encoding and recognition phases.**

| Encoding phase                                                                | Foils for recognition |
|-------------------------------------------------------------------------------|-----------------------|
| <b>Food</b>                                                                   |                       |
| Picture 19: Boy lying on a couch, empty cups and food wrappers on the floor   | Picture 21            |
| Picture 93: People ordering food at a fast food counter                       | Picture 81            |
| Picture 77: Girl eating her breakfast)                                        | Picture 55            |
| Picture 178: Girl handing an ice cream to a boy                               | Picture 136           |
| Picture 153: Two adults and two children having a meal together               | Picture 44            |
| <b>School</b>                                                                 |                       |
| Picture 143: Woman and girls using computers                                  | Picture 7             |
| Picture 151: Man opening the door to two children                             | Picture 152           |
| Picture 30: Girl sitting alone, while two other girls are chatting behind her | Picture 23            |
| Picture 149: Two girls and a boy writing in books                             | Picture 45            |
| Picture 63: People in a library                                               | Picture 48            |
| <b>Fun</b>                                                                    |                       |
| Picture 139: Girl playing a game while a boy looks on                         | Picture 52            |
| Picture 197: Two boys playing with water guns                                 | Picture 202           |
| Picture 191: Children playing with skipping rope                              | Picture 117           |
| Picture 190: Children on a bike and a skateboard                              | Picture 99            |
| Picture 194: People at a birthday party                                       | Picture 177           |

*Table S2: Overview of pictures from encoding and recognition phases. Numbers and descriptions according to the PiSCES Database (Teh, E. J., Yap, M. J., & Liow, S. J. R. (2018). PiSCES: Pictures with social context and emotional scenes with norms for emotional valence, intensity, and social engagement. Behav Res Methods, 50(5), 1793-1805. <https://doi.org/10.3758/s13428-017-0947-x>)*
