# Supplementary material for: Bias in Youth with Functional Abdominal Pain (BY-FAP) – A new experimental design to examine cognitive biases for gastrointestinal related stimuli in children and adolescents
Source: Preprints.org preprint supplement (doi:10.20944/preprints202306.0017.v1), 2023-06-01
Supplement: Supplementary file 2 [file supplementary]

Archive with 1 entries (1 files):
- Supplementary material.pdf
